# Supplementary material for: Dosage-sensitive miRNAs trigger modulation of gene expression during genomic imbalance in maize
Source: PubMed Central journal article supplement (PMC9156689; doi:10.1038/s41467-022-30704-x), 2022-05-31
Supplement: 41467_2022_30704_MOESM2_ESM.pdf [file 41467_2022_30704_MOESM2_ESM.pdf]

## **Description of Additional Supplementary Files**

File Name: Supplementary Data 1

Description: Read mapping statistics and grouping information of each sRNA-seq experiment.

File Name: Supplementary Data 2

Description: Information of MIRNA loci identified by ShortStack.

File Name: Supplementary Data 3

Description: The number of DEMs in each comparison.

File Name: Supplementary Data 4

Description: Mean expression levels of identified MIRNA loci and DME analysis for each MIRNA loci.

File Name: Supplementary Data 5

Description: Mean, median, SD for ratios of miRNAs with extreme values (ratio >6 or < 1/6) excluded.

File Name: Supplementary Data 6

Description: Predicted targets of miRNAs identified by psRNATarget.

File Name: Supplementary Data 7

Description: Significant correlations between expression levels of miRNAs and their mRNA targets predicted by psRNATarget.

File Name: Supplementary Data 8

Description: Significant correlations between expression levels of miRNAs and their mRNA targets found in degradome sequencing data.
